# Supplementary material
Source: PubMed Central journal article supplement (PMC4152232)
Supplement: NIHMS97749-supplement-01.pdf [file NIHMS97749-supplement-01.pdf]

**SUPPLEMENTAL TABLE 1.** Detailed MFMAP Results for the Two-Point and Multipoint Linkage Using the African-American Samples

| Two-Point Linkage Results |             |          |                                 |                        |                                |          |       |       |       |       |           |  |
|---------------------------|-------------|----------|---------------------------------|------------------------|--------------------------------|----------|-------|-------|-------|-------|-----------|--|
| CHR                       | Linkage Map | Marker   | LOD Assuming Homogeneity (MLOD) |                        | LOD Assuming Admixture (MALOD) |          |       |       |       |       |           |  |
|                           |             |          |                                 | Model-Free LOD (MFLOD) | MALOD                          | $\alpha$ | q     | f0    | f1    | f2    | Model     |  |
| 1                         | 56.7        | D1S1622  | 1.38                            | 1.05                   | 1.38                           | 1.00     | 0.031 | 0.050 | 0.249 | 0.249 | Dominant  |  |
| 4                         | 78.4        | D4S2367  | 1.35                            | 1.89                   | 1.95                           | 0.30     | 0.031 | 0.001 | 0.999 | 0.999 | Dominant  |  |
| 6                         | 0.0         | D6S942   | 1.54                            | 0.47                   | 1.65                           | 0.70     | 0.247 | 0.038 | 0.038 | 0.437 | Recessive |  |
|                           | 152.6       | D6S2436  | 1.59                            | 1.00                   | 1.61                           | 0.60     | 0.031 | 0.038 | 0.437 | 0.437 | Dominant  |  |
|                           | 164.8       | D6S1035  | 1.23                            | 1.15                   | 1.30                           | 0.60     | 0.031 | 0.038 | 0.437 | 0.437 | Dominant  |  |
|                           | 173.3       | D6S1277  | 0.71                            | 0.66                   | 1.03                           | 0.30     | 0.247 | 0.025 | 0.025 | 0.624 | Recessive |  |
|                           | 187.2       | D6S1027  | 1.42                            | 0.08                   | 1.42                           | 1.00     | 0.247 | 0.050 | 0.050 | 0.249 | Recessive |  |
| 7                         | 41.7        | D7S1808  | 1.31                            | 1.01                   | 1.34                           | 0.50     | 0.031 | 0.038 | 0.437 | 0.437 | Dominant  |  |
|                           | 50.3        | D7S817   | 1.17                            | 1.25                   | 1.30                           | 0.40     | 0.031 | 0.025 | 0.624 | 0.624 | Dominant  |  |
| 18                        | 115.9       | D18S1371 | 1.46                            | 1.12                   | 1.46                           | 1.00     | 0.031 | 0.050 | 0.249 | 0.249 | Dominant  |  |

  

| Multi-Point Linkage Results |                   |                           |                        |                                |          |       |       |       |       |       |           |  |
|-----------------------------|-------------------|---------------------------|------------------------|--------------------------------|----------|-------|-------|-------|-------|-------|-----------|--|
| Linkage Map                 | Marker Interval   | LOD Assuming Homog (MLOD) |                        | LOD Assuming Admixture (MALOD) |          |       |       |       |       |       |           |  |
|                             |                   |                           | Model-Free LOD (MFLOD) | MALOD                          | $\alpha$ | q     | f0    | f1    | f2    | Model |           |  |
| 61.0                        | D1S1622-D1S1255   | 0.59                      | 0.43                   | 0.89                           | 0.10     | 0.247 | 0.001 | 0.001 | 0.999 | 0.999 | Recessive |  |
| 70.5                        | D4S2367-D4S3243   | 0.99                      | 0.84                   | 1.03                           | 0.20     | 0.031 | 0.001 | 0.999 | 0.999 | 0.999 | Dominant  |  |
| 156.7                       | D6S2436-D6S1035   | 1.40                      | 1.23                   | 1.65                           | 0.60     | 0.031 | 0.038 | 0.437 | 0.437 | 0.437 | Dominant  |  |
| 166.0                       | D6S1035-D6S1277   | 1.13                      | 1.38                   | 1.46                           | 0.40     | 0.031 | 0.025 | 0.624 | 0.624 | 0.624 | Dominant  |  |
| 180.6                       | D6S1277-D6S1027   | 1.65                      | 0.00                   | 1.65                           | 1.00     | 0.247 | 0.050 | 0.050 | 0.249 | 0.249 | Recessive |  |
| 46.0                        | D7S1808-D7S817    | 1.82                      | 1.65                   | 1.87                           | 0.60     | 0.031 | 0.038 | 0.437 | 0.437 | 0.437 | Dominant  |  |
| 54.0                        | D7S817-D7S2846    | 0.99                      | 1.10                   | 1.15                           | 0.50     | 0.247 | 0.038 | 0.038 | 0.437 | 0.437 | Recessive |  |
| 120.8                       | D18S1371-D18S1390 | 0.22                      | 0.34                   | 0.46                           | 0.20     | 0.031 | 0.001 | 0.999 | 0.999 | 0.999 | Dominant  |  |

CHR = ? ; LOD = ? ; MALOD = ? ; MFLOD = ? ; MFMAP = ? ; MLOD = ? ;

**SUPPLEMENTAL TABLE 2.** Detailed MFMAP Results for the Two-Point and Multipoint Linkage in the White Families

| Two-Point Linkage Results                                                         |                         |                                 |                                 |                        |                        |                                |                                |               |               |                  |                  |       |
|-----------------------------------------------------------------------------------|-------------------------|---------------------------------|---------------------------------|------------------------|------------------------|--------------------------------|--------------------------------|---------------|---------------|------------------|------------------|-------|
| CHR                                                                               | Linkage Map             | Marker                          | LOD Assuming Homogeneity (MLOD) |                        | Model-Free LOD (MFLOD) |                                | LOD Assuming Admixture (MALOD) |               |               |                  |                  | Model |
|                                                                                   |                         |                                 | MLOD                            | MLOD                   | MALOD                  | $\alpha$                       | q                              | f0            | f1            | f2               |                  |       |
| 1                                                                                 | 136.9                   | D1S1631                         | 0.87                            | 0.05                   | 1.83                   | 0.30                           | 0.247                          | 0.001         | 0.001         | 0.999            | Recessive        |       |
| 6                                                                                 | 118.6                   | D6S474                          | 0.61                            | 0.00                   | 0.74                   | 0.60                           | 0.241                          | 0.0358        | 0.0358        | 0.435            | Recessive        |       |
|                                                                                   | 128.9                   | D6S1040                         | 0.69                            | 1.17                   | 1.17                   | 0.30                           | 0.0295                         | 0.001         | 0.999         | 0.999            | Dominant         |       |
|                                                                                   | <b>137.7</b>            | <b>D6S1009</b>                  | <b>2.86</b>                     | <b>0.14</b>            | <b>2.87</b>            | <b>0.90</b>                    | <b>0.241</b>                   | <b>0.0242</b> | <b>0.0242</b> | <b>0.623</b>     | <b>Recessive</b> |       |
| 11                                                                                | 33                      | ATA34E08                        | 1.12                            | 0.00                   | 1.15                   | 0.90                           | 0.0295                         | 0.0474        | 0.247         | 0.247            | Dominant         |       |
| 12                                                                                | 36.1                    | D12S373                         | 1.15                            | 0.00                   | 1.45                   | 0.40                           | 0.241                          | 0.001         | 0.001         | 0.999            | Recessive        |       |
|                                                                                   | 48.7                    | D12S1042                        | 1.28                            | 0.38                   | 1.29                   | 0.90                           | 0.241                          | 0.0358        | 0.0358        | 0.435            | Recessive        |       |
|                                                                                   | 125.3                   | D12S2070                        | 0.45                            | 1.20                   | 1.20                   | 0.20                           | 0.0295                         | 0.001         | 0.999         | 0.999            | Dominant         |       |
| 14                                                                                | 125.9                   | D14S1426                        | 0.12                            | 0.21                   | 0.73                   | 0.20                           | 0.241                          | 0.001         | 0.001         | 0.999            | Recessive        |       |
|                                                                                   | 138.2                   | D14S1007                        | 0.57                            | 0.45                   | 1.59                   | 0.30                           | 0.241                          | 0.001         | 0.001         | 0.999            | Recessive        |       |
| <b>20</b>                                                                         | <b>54.1</b>             | <b>D20S478</b>                  | <b>2.46</b>                     | <b>0.55</b>            | <b>2.46</b>            | <b>1.00</b>                    | <b>0.241</b>                   | <b>0.0358</b> | <b>0.0358</b> | <b>0.435</b>     | <b>Recessive</b> |       |
|                                                                                   | 62.3                    | D20S481                         | 1.42                            | 1.12                   | 1.43                   | 0.90                           | 0.241                          | 0.0358        | 0.0358        | 0.435            | Recessive        |       |
|                                                                                   | 79.9                    | D20S480                         | 1.04                            | 1.19                   | 1.50                   | 0.60                           | 0.0295                         | 0.0126        | 0.811         | 0.811            | Dominant         |       |
|                                                                                   | 90.1                    | D20S451                         | 1.07                            | 0.73                   | 1.10                   | 0.80                           | 0.0295                         | 0.0474        | 0.247         | 0.247            | Dominant         |       |
| Multipoint Linkage Results                                                        |                         |                                 |                                 |                        |                        |                                |                                |               |               |                  |                  |       |
| Linkage Map                                                                       | Marker Interval         | LOD Assuming Homogeneity (MLOD) |                                 | Model-Free LOD (MFLOD) |                        | LOD Assuming Admixture (MALOD) |                                |               |               |                  | Model            |       |
|                                                                                   |                         | MLOD                            | MLOD                            | MALOD                  | $\alpha$               | q                              | f0                             | f1            | f2            |                  |                  |       |
| 138.6                                                                             | D1S1631-D1S3723         | 1.08                            | 0.00                            | 1.25                   | 0.4                    | 0.247                          | 0.013                          | 0.013         | 0.812         | Recessive        |                  |       |
| 146.1                                                                             | D1S3723-D1S534          | 1.01                            | 0.00                            | 1.01                   | 1                      | 0.247                          | 0.050                          | 0.050         | 0.249         | Recessive        |                  |       |
| 121.8                                                                             | D6S474-D6S1040          | 0.68                            | 0.28                            | 1.02                   | 0.5                    | 0.241                          | 0.024                          | 0.024         | 0.623         | Recessive        |                  |       |
| <b>130.2</b>                                                                      | <b>D6S1040-D6S1009</b>  | <b>2.19</b>                     | <b>1.09</b>                     | <b>2.19</b>            | <b>1</b>               | <b>0.241</b>                   | <b>0.036</b>                   | <b>0.036</b>  | <b>0.435</b>  | <b>Recessive</b> |                  |       |
| 139.7                                                                             | D6S1009-GATA184A08      | 1.28                            | 0.00                            | 1.41                   | 0.6                    | 0.241                          | 0.024                          | 0.024         | 0.623         | Recessive        |                  |       |
| 27.2                                                                              | D11S1981-ATA34E08       | 1.48                            | 0.35                            | 1.48                   | 1                      | 0.030                          | 0.047                          | 0.247         | 0.247         | Dominant         |                  |       |
| <b>42.3</b>                                                                       | <b>D12S373-D12S1042</b> | <b>2.42</b>                     | <b>0.23</b>                     | <b>2.42</b>            | <b>1</b>               | <b>0.241</b>                   | <b>0.036</b>                   | <b>0.036</b>  | <b>0.435</b>  | <b>Recessive</b> |                  |       |
| 52.0                                                                              | D12S1042-GATA91H06      | 1.31                            | 0.28                            | 1.31                   | 1                      | 0.241                          | 0.047                          | 0.047         | 0.247         | Recessive        |                  |       |
| 132.0                                                                             | D14S1426-D14S1007       | 0.34                            | 0.44                            | 1.25                   | 0.2                    | 0.241                          | 0.001                          | 0.001         | 0.999         | Recessive        |                  |       |
| <b>48.7</b>                                                                       | <b>D20S477-D20S478</b>  | <b>2.01</b>                     | <b>0.79</b>                     | <b>2.14</b>            | <b>0.7</b>             | <b>0.241</b>                   | <b>0.024</b>                   | <b>0.024</b>  | <b>0.623</b>  | <b>Recessive</b> |                  |       |
| <b>56.1</b>                                                                       | <b>D20S478-D20S481</b>  | <b>2.09</b>                     | <b>1.18</b>                     | <b>2.09</b>            | <b>1</b>               | <b>0.241</b>                   | <b>0.036</b>                   | <b>0.036</b>  | <b>0.435</b>  | <b>Recessive</b> |                  |       |
| 69.1                                                                              | D20S481-D20S480         | 1.34                            | 1.64                            | 1.76                   | 0.6                    | 0.030                          | 0.013                          | 0.811         | 0.811         | Dominant         |                  |       |
| CHR = ? ; LOD = ? ; MALOD = ? ; MFLOD = ? ; MFMAP = ? ; MLOD = ? ;                |                         |                                 |                                 |                        |                        |                                |                                |               |               |                  |                  |       |
| Results are shown in bold for markers or marker intervals with MALOD scores >2.0. |                         |                                 |                                 |                        |                        |                                |                                |               |               |                  |                  |       |
